# Supplementary material for: Incidence, prevalence and risk of stroke in patients with Takayasu arteritis: a nationwide population-based study in South Korea
Source: HighWire-hosted journal article supplement (doi:10.1136/svn-2020-000809), 2021-12-08
Supplement: svn-2020-000809supp001_data_supplement.pdf [file svn-2020-000809supp001_data_supplement.pdf]

**Supplementary Figure 1. Patient inclusion and exclusion criteria**

A flowchart describing the inclusion and exclusion criteria for case identification.

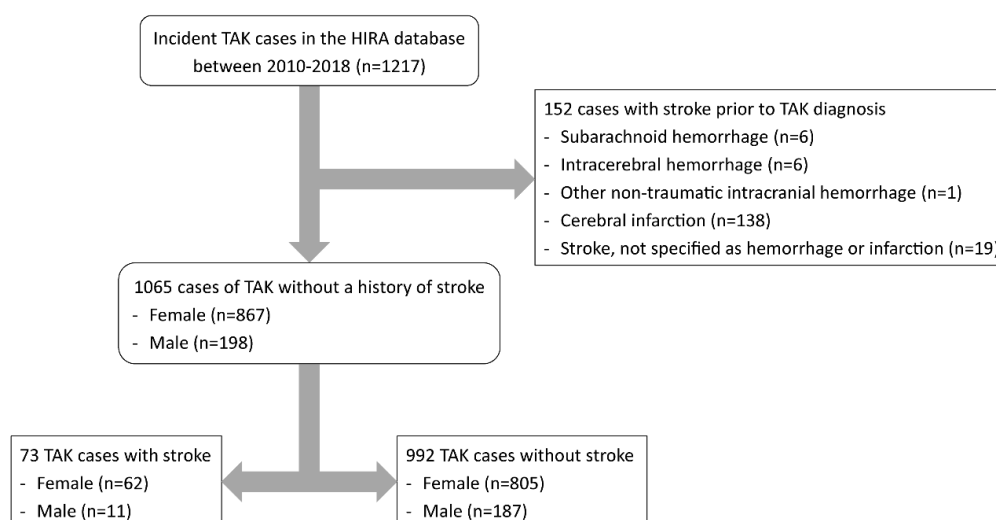

TAK: Takayasu arteritis, HIRA: Health Insurance and Review Assessment.
