# Supplementary material for: Incidence, prevalence and risk of stroke in patients with Takayasu arteritis: a nationwide population-based study in South Korea
Source: HighWire-hosted journal article supplement (doi:10.1136/svn-2020-000809), 2021-12-08
Supplement: svn-2020-000809supp002_data_supplement.pdf [file svn-2020-000809supp002_data_supplement.pdf]

**Supplementary Figure 2. The cumulative incidence plot of stroke after TAK diagnosis**

The cumulative incidence rate of stroke after the diagnosis of TAK was calculated according to sex.

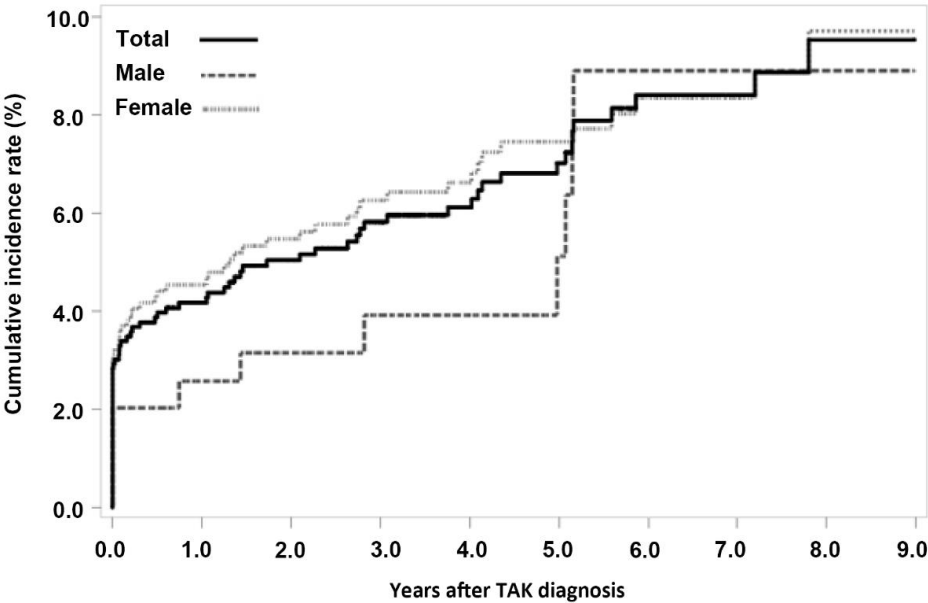

TAK: Takayasu arteritis.
